# Supplementary material
Source: Research Square preprint supplement (doi:10.21203/rs.3.rs-8516861/v1)
Supplement: Supplementary file 1 [file 473bec2235879e136f9aef33.xlsx]

## Sheet: Sheet1
NO.	location site	x	y
1	西安市长安区鸣犊查新村	109.085	34.1144
4	西安市长安区引镇街办光辉村	109.074	34.1189
24	西安市长安区杨庄街道侯官寨	109.13	34.0561
95	西安市长安区黄良街办北湖村	108.916	34.0872
100	西安市长安区子午街办子午村	108.893	34.0578
106	西安市长安区子午街办曹村	108.926	34.0552
135	西安市长安区王曲街办柳家寨村	108.932	34.0911
161	西安市长安区滦镇小新村	108.836	34.058
173	西安市长安区引镇姚家寨水库	109.109	34.0826
189	西安市长安区引镇龙渠村	109.111	34.0471
193	临潼区何寨街道樊曹村	109.342	34.5155
217	阎良区关山镇石川河	109.398	34.7136
335	高陵区张卜街道东关村	109.145	34.4986
353	西安市长安区滦镇街道东留堡村	108.791	34.0658
364	蓝田县汤峪镇柿园村	109.145	34.0831
635	鄠邑区五竹卫生院	108.655	34.112
784	鄠邑区庞光镇王寨村	108.675	34.0408
1363	高陵区张卜街道陈杨村	109.105	34.5122
1425	阎良区武屯街道任张村	109.323	34.6656
1463	鄠邑区余下街办淡家寨	108.664	34.0668
1473	西安市西安市长安区杜曲新村	108.978	34.1279
1504	长安区沣东新城荆寺二村	108.762	34.1705
1555	西安市长安区滦镇小新村	108.836	34.058
1558	周至县尚村镇马村	108.435	34.1731
1573	西安市长安区王曲街办王曲村	108.962	34.0754
1602	西安市长安区子午街办甫店村	108.924	34.0703
1622	西安市长安区引镇枣园村	109.118	34.0759
1637	西安市长安区五台街道星光村	108.986	34.0305
1642	临潼区新市街道焦范村	109.201	34.5468
1649	蓝田县汤峪镇柿园子村东侧	109.14	34.081
1700	西安市长安区大兆街道司马村	109.047	34.1211
1701	西安市长安区王莽街道西王莽村	109.055	34.0565

## Sheet: Sheet2
109.085	34.1144
109.074	34.1189
109.13	34.0561
108.916	34.0872
108.893	34.0578
108.926	34.0552
108.932	34.0911
108.836	34.058
109.109	34.0826
109.111	34.0471
109.342	34.5155
109.398	34.7136
109.145	34.4986
108.791	34.0658
109.145	34.0831
108.655	34.112
108.675	34.0408
109.105	34.5122
109.323	34.6656
108.664	34.0668
108.978	34.1279
108.762	34.1705
108.836	34.058
108.435	34.1731
108.962	34.0754
108.924	34.0703
109.118	34.0759
108.986	34.0305
109.201	34.5468
109.14	34.081
109.047	34.1211
109.055	34.0565
