# Supplementary material
Source: Research Square preprint supplement (doi:10.21203/rs.3.rs-8516861/v1)

S1: Xi’an Center for Disease Control and Prevention Ethical Review Application Form (Approved No: 2025012)


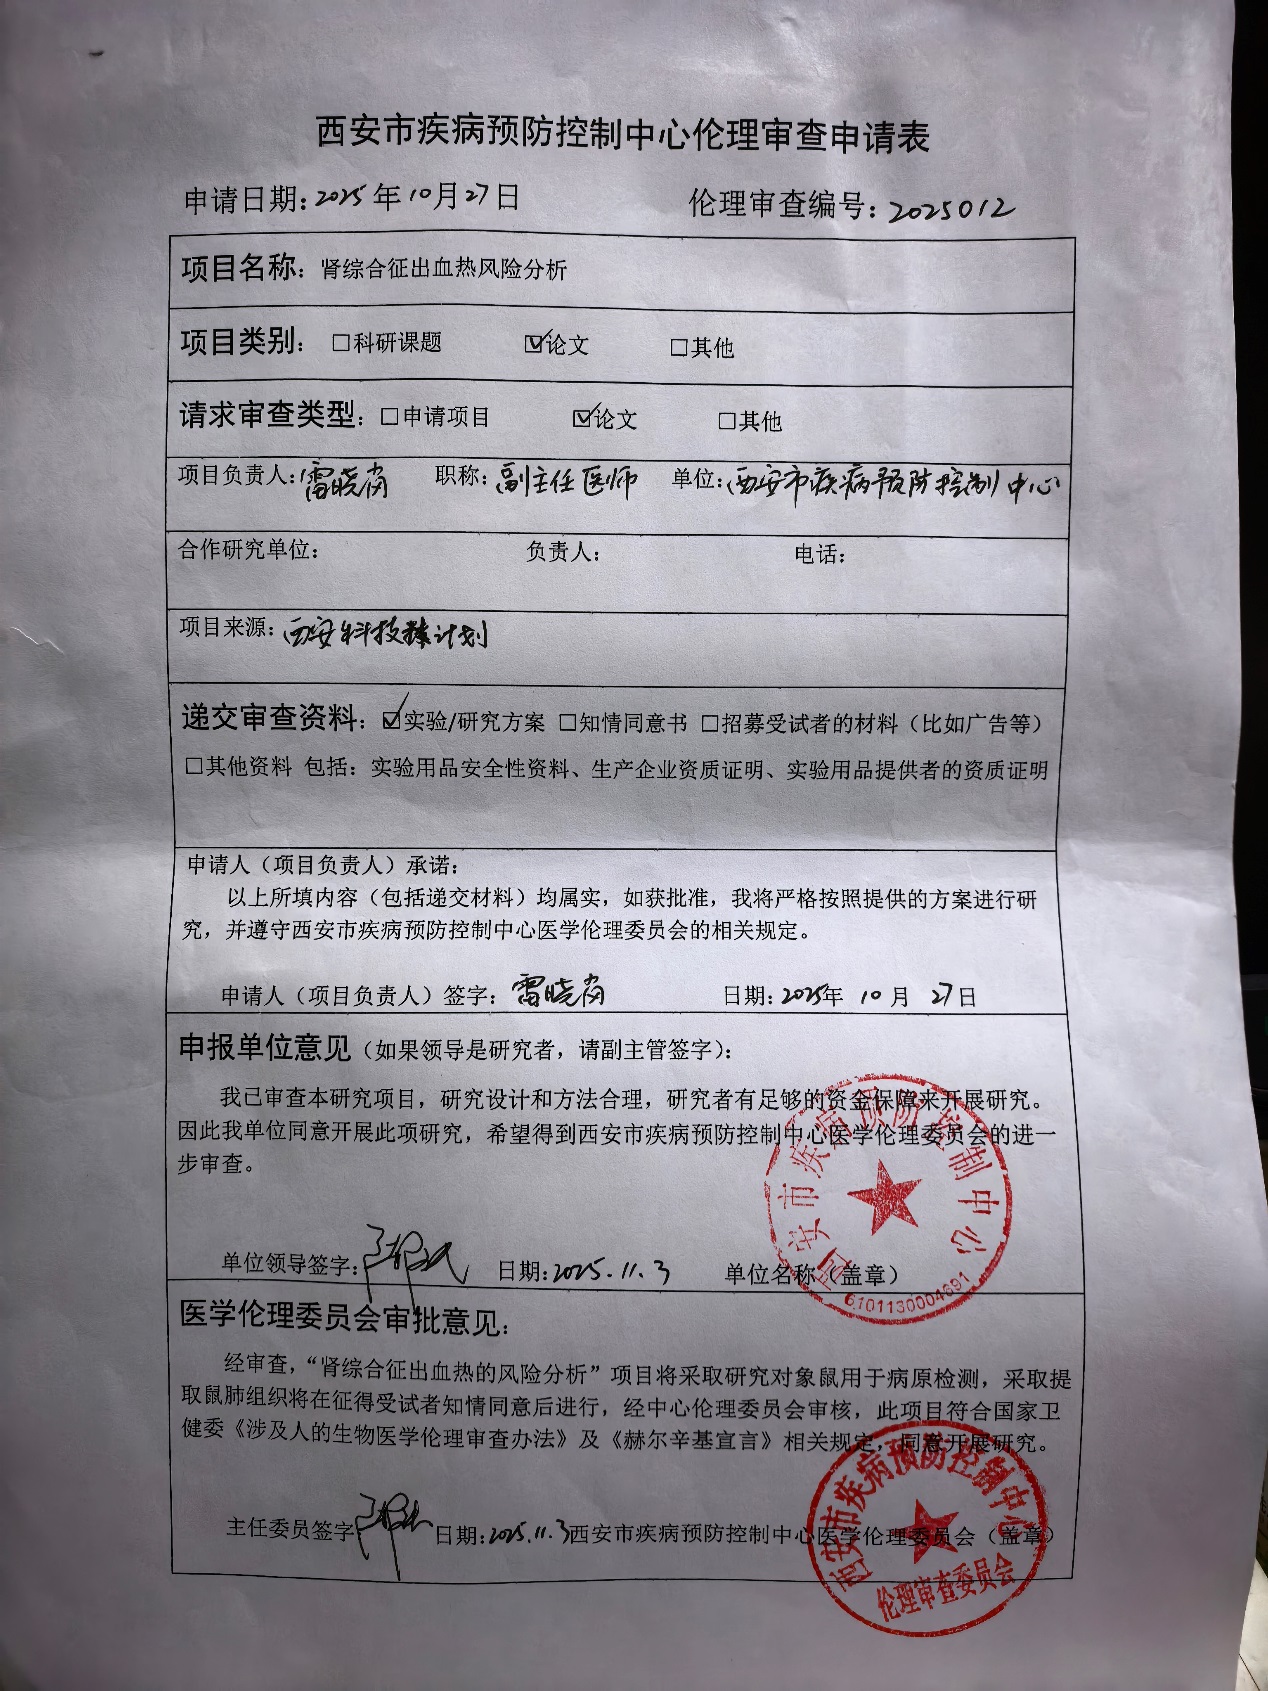


S1: English Copy of Ethical Review Application Table (Approved No: 2025012)


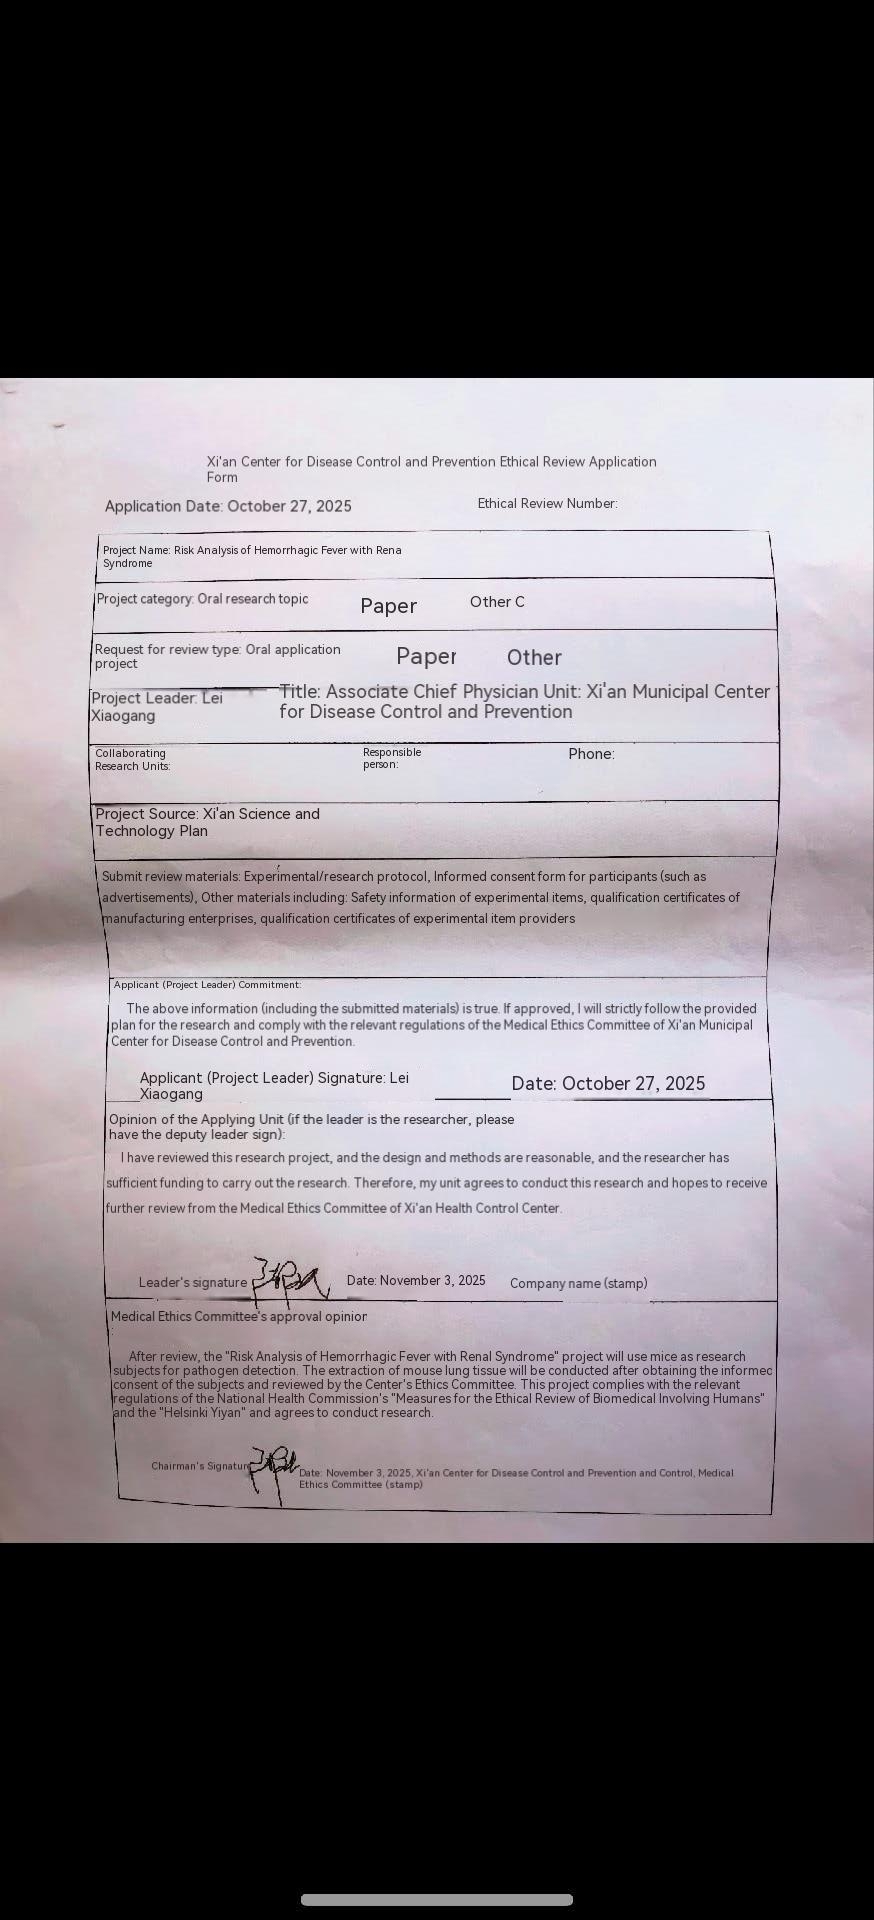

Supplement: Supplementary file 1 [file 636ab1643da468cf24244a2c.docx]
