# Supplementary material
Source: Research Square preprint supplement (doi:10.21203/rs.3.rs-8516861/v1)
Supplement: Supplementary file 3 [file baa4423e815c9757d07dcb14.xlsx]

## Sheet: Sheet1
NO.	fc	rm	tune.args	auc.train	cbi.train	auc.diff.avg	auc.diff.sd	auc.val.avg	auc.val.sd	cbi.val.avg	cbi.val.sd	or.10p.avg	or.10p.sd	or.mtp.avg	or.mtp.sd	AICc	delta.AICc	w.AIC	ncoef
6	H	0.5	fc.H_rm.0.5	0.91577	0.905	0.109751	0.0579428	0.806934	0.0556736	0.70425	0.13051	0.392857	0.243975	0.25	0.0714286	NA	NA	NA	41
1	L	0.5	fc.L_rm.0.5	0.863359	0.832	0.0672703	0.0489378	0.84453	0.0691523	0.644	0.314262	0.178571	0.270424	0.0714286	0.142857	492.573	5.38207	0.0175783	8
2	LQ	0.5	fc.LQ_rm.0.5	0.864948	0.733	0.0624562	0.0490306	0.83902	0.06439	0.606	0.159053	0.25	0.243975	0.0714286	0.142857	500.841	13.6501	0.000281577	10
3	LQH	0.5	fc.LQH_rm.0.5	0.918845	0.884	0.113569	0.063674	0.803875	0.0619223	0.71025	0.153585	0.392857	0.243975	0.285714	0.116642	NA	NA	NA	33
4	LQHP	0.5	fc.LQHP_rm.0.5	0.916488	0.903	0.118516	0.0559705	0.802796	0.0548722	0.72125	0.135044	0.428571	0.26082	0.25	0.0714286	NA	NA	NA	42
5	LQHPT	0.5	fc.LQHPT_rm.0.5	0.93208	0.911	0.130744	0.053221	0.801063	0.0496043	0.685	0.109955	0.428571	0.202031	0.321429	0.136775	NA	NA	NA	47
12	H	1	fc.H_rm.1	0.898066	0.841	0.0681662	0.0496037	0.829775	0.0479143	0.71175	0.126313	0.25	0.0714286	0.107143	0.136775	NA	NA	NA	30
7	L	1	fc.L_rm.1	0.862652	0.884	0.0599825	0.042679	0.840946	0.0580561	0.657	0.0607783	0.107143	0.136775	0.0714286	0.142857	493.539	6.34764	0.0108469	8
8	LQ	1	fc.LQ_rm.1	0.863138	0.854	0.0635272	0.044013	0.836732	0.0615945	0.5975	0.153633	0.142857	0.116642	0.0714286	0.142857	488.508	1.31705	0.134179	7
9	LQH	1	fc.LQH_rm.1	0.89967	0.809	0.0769318	0.0625384	0.820228	0.0565056	0.71375	0.0742849	0.285714	0.116642	0.25	0.0714286	1908.34	1421.15	6.517759e-310	26
10	LQHP	1	fc.LQHP_rm.1	0.900055	0.852	0.0793734	0.0477547	0.822267	0.0421325	0.76525	0.0915291	0.321429	0.136775	0.25	0.0714286	NA	NA	NA	28
11	LQHPT	1	fc.LQHPT_rm.1	0.902848	0.896	0.080697	0.0499649	0.823396	0.0414415	0.77375	0.12161	0.321429	0.136775	0.285714	0.116642	NA	NA	NA	29
18	H	1.5	fc.H_rm.1.5	0.88717	0.835	0.0576987	0.041015	0.837886	0.0470629	0.638	0.131745	0.285714	0.116642	0.0714286	0.142857	593.428	106.237	2.21125e-24	19
13	L	1.5	fc.L_rm.1.5	0.859559	0.857	0.0471443	0.0348155	0.838333	0.0504515	0.5735	0.16368	0.107143	0.136775	0.0357143	0.0714286	487.191	0	0.259225	6
14	LQ	1.5	fc.LQ_rm.1.5	0.860363	0.892	0.0550802	0.0410764	0.832833	0.0533485	0.61525	0.109439	0.142857	0.116642	0.0714286	0.142857	489.855	2.66376	0.0684304	7
15	LQH	1.5	fc.LQH_rm.1.5	0.88682	0.703	0.0593755	0.0433245	0.834093	0.0456416	0.6655	0.0631744	0.357143	0.0824786	0.0714286	0.142857	519.918	32.7267	2.02841e-08	14
16	LQHP	1.5	fc.LQHP_rm.1.5	0.892391	0.787	0.0609349	0.0365193	0.83393	0.0425601	0.65275	0.0592192	0.357143	0.0824786	0.0714286	0.142857	780.458	293.267	5.38855e-65	23
17	LQHPT	1.5	fc.LQHPT_rm.1.5	0.892413	0.782	0.0616449	0.0377933	0.833755	0.0427264	0.6465	0.0628039	0.357143	0.0824786	0.0714286	0.142857	780.443	293.252	5.43013e-65	23
24	H	2	fc.H_rm.2	0.879741	0.898	0.0532933	0.0389218	0.84002	0.0492717	0.575	0.136509	0.178571	0.136775	0.0357143	0.0714286	535.459	48.2682	8.55797e-12	15
19	L	2	fc.L_rm.2	0.855366	0.89	0.0450947	0.0319027	0.82954	0.0533414	0.481	0.221881	0.0714286	0.0824786	0.0714286	0.0824786	488.623	1.43156	0.126712	6
20	LQ	2	fc.LQ_rm.2	0.857409	0.875	0.0457118	0.0330883	0.830739	0.0459501	0.459	0.276231	0.142857	0.116642	0.0357143	0.0714286	491.634	4.44298	0.0281123	7
21	LQH	2	fc.LQH_rm.2	0.882909	0.824	0.04623	0.0382547	0.847027	0.0459122	0.63575	0.104589	0.25	0.0714286	0.0357143	0.0714286	495.275	8.0844	0.00455168	10
22	LQHP	2	fc.LQHP_rm.2	0.888105	0.889	0.0476065	0.038928	0.84442	0.0440015	0.58575	0.245957	0.285714	0.116642	0.107143	0.214286	544.111	56.9199	1.13154e-13	16
23	LQHPT	2	fc.LQHPT_rm.2	0.888102	0.889	0.0476053	0.0389286	0.84442	0.0440015	0.58575	0.245957	0.285714	0.116642	0.107143	0.214286	595.657	108.466	7.25374e-25	19
30	H	2.5	fc.H_rm.2.5	0.873505	0.9	0.0570876	0.0382294	0.83086	0.0554212	0.52675	0.160892	0.142857	0.116642	0.0357143	0.0714286	529.978	42.7873	1.32599e-10	14
25	L	2.5	fc.L_rm.2.5	0.852991	0.731	0.0425971	0.038589	0.823135	0.0559329	0.39125	0.252302	0.0714286	0.0824786	0.0714286	0.0824786	490.389	3.19759	0.0523996	6
26	LQ	2.5	fc.LQ_rm.2.5	0.856437	0.718	0.0390464	0.0339056	0.82712	0.0478577	0.34475	0.324331	0.107143	0.0714286	0.0714286	0.0824786	493.518	6.32703	0.0109592	7
27	LQH	2.5	fc.LQH_rm.2.5	0.878862	0.86	0.0406963	0.0383013	0.846998	0.0486046	0.676	0.0829498	0.142857	0.116642	0.0357143	0.0714286	493.093	5.9018	0.0135556	9
28	LQHP	2.5	fc.LQHP_rm.2.5	0.885938	0.861	0.0417322	0.0452686	0.843791	0.0482345	0.706	0.0710117	0.214286	0.0824786	0.0357143	0.0714286	525.975	38.7837	9.81523e-10	14
29	LQHPT	2.5	fc.LQHPT_rm.2.5	0.885938	0.861	0.041731	0.0452697	0.843791	0.0482345	0.706	0.0710117	0.214286	0.0824786	0.0357143	0.0714286	535.667	48.476	7.71334e-12	15
36	H	3	fc.H_rm.3	0.871405	0.728	0.0659045	0.0414172	0.818225	0.0647337	0.2295	0.11248	0.214286	0.184428	0.107143	0.136775	534.336	47.1448	1.50077e-11	14
31	L	3	fc.L_rm.3	0.850163	0.695	0.0429289	0.041134	0.820764	0.0566231	0.34225	0.41368	0.0714286	0.0824786	0.0714286	0.0824786	488.617	1.42604	0.127062	5
32	LQ	3	fc.LQ_rm.3	0.854027	0.612	0.0424529	0.0363957	0.825648	0.0526402	0.272	0.319903	0.0714286	0.0824786	0.0714286	0.0824786	488.379	1.18837	0.143096	5
33	LQH	3	fc.LQH_rm.3	0.874448	0.814	0.0414647	0.0444714	0.839171	0.0596402	0.42525	0.297875	0.142857	0.116642	0.0357143	0.0714286	496.102	8.91094	0.00301087	9
34	LQHP	3	fc.LQHP_rm.3	0.884041	0.854	0.0407208	0.0529156	0.837872	0.0548013	0.524	0.259669	0.214286	0.142857	0.0357143	0.0714286	538.842	51.6509	1.57701e-12	15
35	LQHPT	3	fc.LQHPT_rm.3	0.884023	0.864	0.0407279	0.0529294	0.837865	0.0548119	0.52375	0.260104	0.214286	0.142857	0.0357143	0.0714286	538.844	51.6529	1.57542e-12	15
